# Supplementary material for: Soil erodibility and its influencing factors on the Loess Plateau of China: a case study in the Ansai watershed
Source: Copernicus journal article supplement (doi:10.5194/se-9-1507-2018), 2018-12-20

**Soil erodibility ~~estimation by using five methods~~ and its influencing factors on the Loess Plateau of ~~estimating K value~~ China: A case study in ~~the~~ Ansai watershed ~~of Loess Plateau, China~~**

Wenwu Zhao, Hui Wei, ~~Lizhi Jia~~, Stefani Daryanto, ~~Xiao Zhang, Lizhi Jia~~, Yanxu Liu

State Key Laboratory of Earth Surface Processes and Resources Ecology, Faculty of Geographical Science,  
Beijing Normal University, Beijing 100875, China

Institute of Land Surface System and Sustainable Development, Faculty of Geographical Science, Beijing  
Normal University, Beijing 100875, China

Correspondence to: Wenwu Zhao ([Zhaoww@bnu.edu.cn](mailto:Zhaoww@bnu.edu.cn))

**Abstract**

The objectives of this work were to ~~select~~ identify the possible best ~~texture-based~~ method to estimate soil erodibility (K) and understand ~~possible indirect environmental~~ the influencing factors of soil erodibility. In this study, 151 soil samples were collected during soil surveys in ~~the~~ Ansai watershed. ~~Five methods of estimating K value were used to estimate soil erodibility, including the~~ the Loess Plateau of China. The K values were estimated by five methods: erosion-productivity impact model (EPIC), ~~the~~ nomograph equation (NOMO), ~~the~~ modified nomograph equation (M-NOMO), ~~the~~ Torri model and ~~the~~ Shirazi model. The main conclusions of this paper are (1) K values in the Ansai watershed ranged between 0.009 and 0.092 t·hm<sup>2</sup>·hr/(MJ·mm·hm<sup>2</sup>). ~~The K values based on Torri, NOMO, and Shirazi models were similar~~, and the maximum values were 1.872-7.333 times larger than the corresponding minimum values, and ~~were located close to each other in the Taylor diagrams. By combining the measured soil erodibility, we suggested Shirazi and Torri model as models were considered~~ the optimal models for ~~the~~ Ansai watershed. (2) Different land use types had different levels of importance; PC accounted for 100% (native grassland), 48.88% (sea buckthorn), 62.05% (Caragana korshinskii) and 53.61% (pasture grassland) of the variance in soil erodibility. (3) The correlations between soil erodibility and the selected environmental variables

~~changed for~~differed among different vegetation ~~typetypes~~. For native grasslands, soil erodibility had significant correlations with terrain factors. For the most artificially managed vegetation types (e.g., apple orchards) and artificially restored vegetation types (e.g., sea buckthorn), ~~the~~ soil erodibility had significant correlations with the growing conditions of vegetation. ~~The dominant factors that influenced soil erodibility differed with different vegetation types.~~ Soil erodibility had indirect ~~relationship with~~relationships not only with environmental factors (e.g., elevation and slope~~);~~ but also human activities~~,~~ which potentially altered soil erodibility.

**Keywords:** Influencing factors, Soil erodibility, Variation features, Shirazi model, Torri model

## 1 Introduction

Soil erodibility ( $K$ ), ~~as~~ one of the key factors of soil erosion (Igwe, 2003; Fu et al., 2005; Ferreira et al., 2015), is defined as the susceptibility of soil to erosional processes (Bagarello et al., 2012; Bryan et al., 1989). It has been extensively used in both theoretical and practical approaches to measure soil erosion. ~~Yet~~However, it is a complex concept ~~and is~~ affected by many factors, including soil properties (~~e.g., soil texture, permeability and structural stability~~) (Chen et al., 2013; Wang et al., 2015; Manmohan et al., 2012~~);~~ terrain (Wang et al., 2012; Mwaniki et al., 2015; Parajuli et al., 2015~~);~~ climate (Hussein et al., 2013; Sanchis et al., 2010~~);~~ vegetation (Sepúlveda-Lozada et al., 2009~~);~~ and land use (Cerdà et al., 1998; Tang et al., 2016). ~~In order to~~To calculate soil erodibility, many strategies have been used to perform ~~research~~researches to understand soil erodibility, including measurements of physical and chemical soil properties, instrumental measurements, mathematical models and graphical methods (Wei et al., ~~2017~~2017a). Although ~~at~~the direct measurement of soil erosion within large plots under natural rainfall over long-term ~~period~~periods can provide ~~more~~ accurate estimates of soil erodibility, this method is time consuming and ~~very expensive~~costly (Bonilla et al., 2012; Vaezi et al., 2016a, b). Therefore, mathematical models are more commonly used to estimate soil erodibility.

Some of the most common estimation models are the nomogram model (NOMO) and the modified nomogram

model, (M-NOMO), which were established by Wischmeier (Wischmeier et al., 1971, 1978); the erosion-productivity impact model (EPIC), which was developed by Williams (Williams et al., 1990); the best nonlinear fitting formula using the physical and chemical properties of the soil, which was developed by Torri (Torri et al., 1997); and the estimation model developed by Shirazi that ~~is using~~uses the average size of the soil geometry (Shirazi et al., 1988). Each estimation method ~~may differ~~differs in terms of ~~their~~ applicability, even within the same area, because the different estimation methods include different physical and chemical soil properties (Lin et al., 2017; Wang et al., 2013b; Kiani et al., 2016). Consequently, the estimated results can differ significantly among methods because soil conditions vary by region (Lin et al., 2017; Wang et al., 2013b). Selecting the optimal estimation method of soil erodibility is therefore critical to estimate the amount of soil erosion.

Soil erosion ~~in~~on the Loess Plateau of China is among the highest in the world (Fu et al., 2009; Huang et al., 2016). The area affected by soil and water loss is as large as  $4.5 \times 10^5 \text{ km}^2$  (~71% of the local land area), and the long-term average sediment loss is up to  $1.6 \times 10^9 \text{ t}$  (Fu et al., 2017). To maintain water quality and ~~to~~ control soil erosion (Fu et al., 2011), the Chinese government has implemented a large-scale policy to convert farmlands to forests and grasslands since the 20<sup>th</sup> century (Lü et al., 2012; Feng et al., 2013b; Wu et al., 2016). Although ~~this~~the large-scale introduction of vegetation ~~should reduce~~is expected to have reduced soil erosion, the extent of the reduction remains unclear. ~~Accordingly~~Therefore, different estimation methods should be used to calculate erosion factors, including the soil erodibility factor. In this ~~article, study, the~~ Ansai watershed ~~in~~of the Loess Plateau of China was chosen as a case study, and the five above ~~five-mentioned~~ estimation methods of estimating  $K$  value were ~~used, and the~~applied. The objectives of this study ~~are~~were (1) to estimate the soil erodibility factor with different methods; (2) to select the ~~possible best texture-based~~optional method to estimate  $K$ ; and (3) to understand ~~possible indirect environmental~~the influencing factors ~~on~~of soil erodibility for the local area.

## 2 Materials and methods

## 2.1 Study area

The Ansai watershed (108°5'44"-109°26'18"E, 36°30'45"-37°19'3"N) is located ~~in~~around the upper reaches of the Yanhe River, in the inland hinterland of the northwestern Loess Plateau. This watershed lies in the northern part of Shanxi ~~province~~Province and ~~the inland hinterland of the northwestern Loess Plateau and at the edge of~~borders the Ordos basin. It belongs to the typical loess hilly-gully region and covers an area of approximately 1334 km<sup>2</sup>. The soil type in the study area is loess soil, with low fertility and high vulnerability to erosion (Zhao et al., 2012; Yu et al., 2015), ~~topography is complex and varied, and the ground surface is fragmented. The elevations within the watershed are high in the northwest and low in the southeast, and these elevations range from 997 to 1731 m above sea level.~~ The topography is complex and varied, and the land surface is fragmented into different land uses, dominated by ~~The watershed belongs to the mid-temperate continental semi-arid monsoon climate region. The average annual precipitation is 505.3 mm, and 74 percent of the rainfall occurs from June to September. The predominant land use types in the Ansai watershed are~~ rain-fed farmland, apple orchard, native grassland, pasture grassland, shrubland, and forest (Feng et al., 2013a). The elevations within the watershed are high in the northwest and low in the southeast, ranging between 997 and 1731 m above sea level. The watershed belongs to the mid-temperate continental semi-arid monsoon climate region. The soil type in this study area is loess soil The average annual precipitation is 505.3 mm, and 74% of the rainfall occurs from June to September. ~~with low fertility and high vulnerability to erosion (Zhao et al., 2012; Yu et al., 2015).~~

## 2.2 Sample point setting

The soil data used in this study came from 151 typical sample data sets that were obtained during soil surveys conducted from July to September ~~in~~ 2014. The soil ~~type~~type of all 151 sample points ~~are~~is loess soil. Representative vegetation types were selected, ~~which included:~~ (1) natural vegetation, ~~including:~~ native ~~grassland~~grasslands (NG); (2) artificially managed vegetation types, ~~including:~~ apple orchards (AO) and farmland

(FL); and (3) artificially restored vegetation types, ~~including:~~ pasture ~~grassland~~grasslands (PG), sea buckthorn (SB), *Caragana korshinskii* (CK), David's peach (DP), ~~and~~ and black locust (BL). The distance between each vegetation ~~sampling~~ site sampled was at least 2 km, and the area of each vegetation type was greater than 30 m by 30 m, ~~and the~~. The selected sample plots were distributed evenly within the study area. The sample plots within the farmland and grassland had a size of 2 ~~m-by~~ 2 m, whereas the corresponding dimensions for the sample plots within the shrubland and forest areas were 5 ~~m-by~~ 5 m and 10 ~~m-by~~ 10 m, respectively. Each sample plot was ~~repeated~~replicated three times. The locations of the sampling points were determined using a GPS unit (Garmin eTrex 309X), Garmin Ltd. subsidiary in Shanghai, China. The collected soil samples were taken ~~back~~ to the laboratory, dried naturally, ground and ~~filtered~~sieved with a 2-mm sieve. The ~~grain~~soil particle size distributions of the soil samples were evaluated using the hydrometer method. The size classes of ~~the~~soil particles in this study were based on USDA classes and were as follows: sand (0.005-2.0 mm), silt (0.002-0.05 mm) and clay (< 0.002 mm) (Wang, et al., 2012).

To fully explore the primary factors influencing soil erodibility in the Ansai watershed, we chose four types of environmental factors, ~~including:~~ physicochemical soil properties, topographic factors, climate factors and vegetation factors. ~~While~~Although soil ~~erodibility~~erodibility does not directly depend on environmental factors, soil properties such as soil particle size distribution and soil organic matter can be affected by environmental factors. ~~Soil erodibility;~~ thus ~~has indirect relationship with the~~, environmental factors ~~have indirect relationships with soil erodibility~~. These environmental factors covered 20 independent variables, ~~specifically:~~ elevation (Ele), slope position (SP), slope aspect (SA), slope gradient (SG), slope shape (SS), clay ~~(Cla)~~ content, (Cla), silt ~~(Sil)~~ content, (Sil), sand ~~(San)~~ content, (San), organic matter (OM) content, soil bulk density (SBD), porosity (Por), average annual rainfall (AAR), vegetation coverage (VC), aboveground biomass (AB), vegetation height (VH), litter biomass (LB), plant density (PD), crown width (Cro), basal diameter (BD), and branch number (BN). All of

the data on environmental factors were derived from the field surveys. The main characteristics and sampling numbers for the study area are shown in Table 1, and the sampling points are shown in Fig. 1. Based on the results of the Spearman correlation analysis, we ~~then~~ retained some environmental variables that displayed significant correlations ( $P < 0.05$ ) with soil erodibility to perform a principal component analysis (PCA) and ~~to~~ obtain the minimum data set (MDS) (Xu et al., 2008). Only those principal components (PCs) with eigenvalues  $N > 1.0$  and only those variables with highly weighted factor loadings (i.e., those with absolute values within 10% of the highest value) were retained for the MDS (Mandal et al., 2008).

## 2.3 Research methods

Soil erodibility indicates the degree of difficulty ~~that with which~~ soil becomes separated, eroded and transported by rainfall ~~erosion~~ erosivity (Wang et al., 2013a; Cerdà et al., 2017). ~~Soil~~ The soil erodibility factor, which is commonly known as the  $K$ -factor in ~~the model~~ models, is defined as the average rate of soil loss per unit of rainfall erosivity index from a cultivated continuous fallow plot on a 22.1-m-long, 9% slope in the universal soil loss equation (Zhang et al., 2008). To minimize bias from ~~using only one~~ any single estimation method, we estimated the  $K$  values using five estimation models (i.e., EPIC, NOMO, M-NOMO, Torri and Shirazi), ~~that which~~ have been widely applied in ~~the~~ research on soil erodibility (Wischmeier et al., 1971, 1978; Williams et al., 1990; Torri et al., 1997; Shirazi et al., 1988).

### 2.3.1 $K$ value estimation using the EPIC model

The erosion-productivity impact model (EPIC) developed by Williams (Williams et al. 1990) is as follows:

$$K = [0.2 + 0.3e^{-0.0256.SAN(1-\frac{SIL}{100})}] (\frac{SIL}{CLA + SIL})^{0.3} (1.0 - \frac{0.25C}{C + e^{3.72 - 2.95C}}) (1.0 - \frac{0.7SN_1}{SN_1 + e^{-5.51 + 22.9SN_1}}) \quad (1)$$

$$K = [0.2 + 0.3e^{-0.0256.SAN(1-\frac{SIL}{100})}] (\frac{SIL}{CLA + SIL})^{0.3} (1.0 - \frac{0.25C}{C + e^{3.72 - 2.95C}}) (1.0 - \frac{0.7SN_1}{SN_1 + e^{-5.51 + 22.9SN_1}})$$

where  $SAN$  is ~~the~~ percent sand content,  $SIL$  is ~~the~~ percent silt content,  $CLA$  is ~~the~~ percent clay content,  $C$  is ~~the~~

percent organic carbon content, and  $SN_1 = 1 - \frac{SAN}{100}$ . The resulting  $K$  value is reported in United States customary units of [short ton·ac·h / (100 ft·short ton·ac·in)].

### 2.3.2 $K$ value estimation using the NOMO model

Wischmeier (Wischmeier et al., 1971) proposed this model after analyzing the ~~relationship~~ relationships between soil erosion and five soil characteristic indicators, ~~including the~~ percent silt+ very fine sand fraction (0.05-0.1 mm), ~~the~~ percent sand fraction, ~~the~~ soil organic matter content, a code for soil structure, and a code for soil permeability:

$$\begin{aligned} \cancel{K} &= [2.1 \times 10^{-4} M^{1.14} (12 - OM) + 3.25(S - 2) + 2.5(P - 3)] / 100 \\ K &= [2.1 \times 10^{-4} M^{1.14} (12 - OM) + 3.25(S - 2) + 2.5(P - 3)] / 100 \end{aligned} \quad (2)$$

where  $M$  is the product of the percent of silt+ very fine sand and the percent of all soil fractions other than clay,  $OM$  is ~~the~~ soil organic matter content (%),  $S$  is ~~the~~ soil structure code, and  $P$  is ~~the~~ soil permeability code. The resulting  $K$  value is reported in United States customary units of [short ton·ac·h / (100 ft·short ton·ac·in)].

### 2.3.3 $K$ value estimation using the M-NOMO model

On the basis of the universal soil loss equation (USLE) model, the RUSLE model was modified for calculating soil erodibility; ~~that is, at the~~ revised nomograph equation was ~~devised~~ modified from the previous nomograph equation (Wischmeier et al., 1978) ~~based on the nomograph equation.~~. The revised nomograph equation is as follows:

$$\begin{aligned} \cancel{K} &= [2.1 \times 10^{-4} M^{1.14} (12 - OM) + 3.25(2 - S) + 2.5(P - 3)] / 100 \\ K &= [2.1 \times 10^{-4} M^{1.14} (12 - OM) + 3.25(2 - S) + 2.5(P - 3)] / 100 \end{aligned} \quad (3)$$

where  $M$  is the product of the percent of silt+ very fine sand and the percent of all soil fractions other than clay,  $OM$  is ~~the~~ soil organic matter content (%),  $S$  is ~~the~~ soil structure code, and  $P$  is ~~the~~ soil permeability code. The resulting  $K$  value is reported in United States customary units of [short ton·ac·h / (100 ft·short ton·ac·in)].

### 2.3.4 K value estimation using the Torri model

Torri (Torri et al., 1997) established this model in 1997 using data describing soil particle size and soil organic matter content. The model has few parameters; and simple data acquisition of the relevant data is simple. The formula used in evaluating for this model is as follows:

$$K = 0.0293(0.65 - D_g + 0.24D_g^2) \times \exp \left\{ -0.0021 \frac{OM}{c} - 0.00037 \left( \frac{OM}{c} \right)^2 - 4.02c + 1.72c^2 \right\} \quad (4)$$

$$K = 0.0293(0.65 - D_g + 0.24D_g^2) \times \exp \left\{ -0.0021 \frac{OM}{c} - 0.00037 \left( \frac{OM}{c} \right)^2 - 4.02c + 1.72c^2 \right\}$$

where  $OM$  is the and  $c$  are percent content of soil organic matter; and  $c$  is the percent content of clay. In addition, the content, respectively.  $D_g$  can be calculated by using the following formula:

$$D_g = \sum f_i \lg \sqrt{d_i d_{i-1}} \quad D_g = \sum f_i \lg \sqrt{d_i d_{i-1}} \quad (5)$$

where  $D_g$  is the Napierian logarithm of the geometric mean of the particle size distribution,  $d_i$  (mm) is the maximum diameter of the  $i$ -th class,  $d_{i-1}$  (mm) is the minimum diameter and  $f_i$  is the mass fraction of the corresponding particle size class. We calculate the calculated  $D_g$  based on three particle-size classes, namely: sand, silt, and clay. The resulting  $K$  values are reported in the international units of  $[(t \cdot \text{hm}^2 \cdot \text{h}) / (\text{MJ} \cdot \text{mm} \cdot \text{hm}^2)]$ .

### 2.3.5 K value estimation using the Shirazi model

Shirazi (Shirazi et al., 1988) put forward a model that is appropriate for situations involving fewer few physical and chemical properties of the soil materials. He The authors suggested that  $K$  values can be calculated through considering by using only the geometric mean diameter ( $D_g$ ) of the soil grains. The relevant formula is:

$$K = 7.594 \left\{ 0.0034 + 0.0405 e^{-\frac{1}{2} \left[ \frac{\log(D_g) + 1.659}{0.7101} \right]^2} \right\} \quad K = 7.594 \left\{ 0.0034 + 0.0405 e^{-\frac{1}{2} \left[ \frac{\log(D_g) + 1.659}{0.7101} \right]^2} \right\} \quad (6)$$

$$D_g (\text{mm}) = e^{\frac{0.01 \sum f_i \ln m_i}{\sum f_i}} \quad \text{Meanwhile, } D_g \text{ in this model can be calculated by using the following formula:} \quad (7)$$

$$D_g(mm) = e^{0.01 \sum f_i \ln m_i}$$

where  $D_g$  is the geometric mean diameter of the soil particles, where  $f_i$  is the weight percentage of the  $i$ -th particle size fraction (%),  $m_i$  is the arithmetic mean of the particle size limits for the  $i$ -th fraction (mm), and  $n$  is the number of particle size fractions. The resulting  $K$  value is reported in United States customary units of [short ton·ac·h<sup>1/2</sup> / (100 ft·short ton·ac·in)].

### 2.3.6 K value comparisons

To increase the comparability of the results from the different estimation models, our research adopted the international units for the  $K$  values, [t·hm<sup>2</sup>·hr<sup>1/2</sup> / (MJ·mm·hm<sup>2</sup>)]. The international  $K$  value is equal to the  $K$  value reported in the United States customary units multiplied by 0.1317. To clarify the form of the distribution, we collected the frequency distribution figures of soil erodibility for each model (Wei et al., 2017a, b). The  $K$  values obtained using the five methods were normally distributed ( $P > 0.05$ ). Therefore, the soil erodibility  $K$  values measured within the study area were statistically analyzed directly, without the need for data conversion (Fang et al., 2016). To discuss the possible best texture-based method to estimate  $K$ , related research on  $K$  estimation, especially that involving measured values of  $K$  on the Loess Plateau of China, was consulted. A Taylor diagram was also used to compare the models.

To clarify the form of the distribution, we adopted the Kolmogorov-Smirnov test (Table 2) and made the frequency distribution figures of soil erodibility for each model (Fig. 2). The  $P > 0.05$  showed that the  $K$  values obtained using the five methods were normally distributed. Therefore, the soil erodibility  $K$  values measured within the study area can be analyzed directly using statistical methods without data conversion (Fang et al. 2016).

### 2.3.6 K value comparisons

In order to discuss the possible best texture-based method to estimate  $K$ , related researches on  $K$  estimation, especially the measured value of  $K$  in Loess Plateau of China, have been collected. Taylor Diagram was also used

~~to compare the difference between models.~~

### 3 Results

#### 3.1 Soil erodibility in the Ansai watershed based on five different models ~~in Ansai watershed~~

We ~~found that the obtained different values when calculating~~ descriptive statistics of the  ~~$K$  values~~ value in the Ansai watershed ~~differed when among the~~ different models ~~were used~~ (Table 2). The range of  $K$  values based on the five methods were between 0.032 and 0.060, 0.046 and 0.092, 0.047 and 0.088, 0.009 and 0.066, and 0.018 and 0.044 [ $\text{t}\cdot\text{hm}^2\cdot\text{hr}/(\text{MJ}\cdot\text{mm}\cdot\text{hm}^2)$ ] for  $K_{\text{EPIC}}$ ,  $K_{\text{NOMO}}$ ,  $K_{\text{M-NOMO}}$ ,  $K_{\text{Torri}}$ , and  $K_{\text{Shirazi}}$ , respectively. The ~~range of the~~ maximum values were 1.875, 2.000, 1.872, 7.333 and 2.444 times larger than the corresponding minimum values (Table 2). The differences between the mean and median values were 0.001, -0.001, 0.000, 0.000, and 0.000 [ $\text{t}\cdot\text{hm}^2\cdot\text{hr}/(\text{MJ}\cdot\text{mm}\cdot\text{hm}^2)$ ] for  $K_{\text{EPIC}}$ ,  $K_{\text{NOMO}}$ ,  $K_{\text{M-NOMO}}$ ,  $K_{\text{Torri}}$ , and  $K_{\text{Shirazi}}$ , respectively. The standard deviations (SDs) of the  $K$  values were 0.408, -0.447, -1.079, -2.639, and 0.059 ~~for  $K_{\text{EPIC}}$ ,  $K_{\text{NOMO}}$ ,  $K_{\text{M-NOMO}}$ ,  $K_{\text{Torri}}$ , and  $K_{\text{Shirazi}}$ , respectively,~~ and the skewnesses. The skewness values of the  $K$  values were 0.946, 0.956, 4.353, 16.872, and 0.009 ~~for  $K_{\text{EPIC}}$ ,  $K_{\text{NOMO}}$ ,  $K_{\text{M-NOMO}}$ ,  $K_{\text{Torri}}$ , and  $K_{\text{Shirazi}}$ , respectively.~~ The  $C_v$  value of  $K_{\text{M-NOMO}}$  was  $0.067 < 10\%$ ; ~~in addition,%, and~~ the  $C_v$  values of  $K_{\text{EPIC}}$ ,  $K_{\text{NOMO}}$ ,  $K_{\text{Torri}}$ , and  $K_{\text{Shirazi}}$  were 0.109, 0.110, 0.113, and 0.182, respectively, all of which ~~were corresponded to~~ between 10-% and 100-%.

In the Taylor diagrams (Taylor, 2001) (Fig. 32), the  $K$  values based on the EPIC model ~~is were~~ used as the reference ~~object~~ objects. The  $K$  values based on the Torri, NOMO, and Shirazi models were similar and ~~were~~ located close to each other. In contrast, ~~there was inconsistency in~~ the  $K$  values estimated by the M-NOMO and EPIC models ~~were inconsistent with the other  $K$  values~~.

#### 3.2 Spearman correlation coefficients ~~between of~~ soil erodibility and environmental variables in the Ansai watershed

The correlations between soil erodibility and the environmental variables varied ~~with~~ among the different

vegetation types (Table S1-S4). In general, soil erodibility in artificially managed vegetation types (apple orchards and David's peach) and artificially restored vegetation types (e.g., sea buckthorn and black locust) had significant ~~correlation~~correlations with vegetation properties. For example, soil erodibility in areas planted with apple orchards had a significant positive correlation with plant density ( $P < 0.05$ , Table S1). ~~The soil~~Soil erodibility ~~of in~~ areas with sea buckthorn had significant negative correlations with ~~the~~ slope gradient and plant density, ~~whereas it had~~ and significant positive correlations with ~~the~~ average annual rainfall and aboveground biomass ( $P < 0.05$ , Table S3). ~~The soil~~Soil erodibility of areas with David's peach had ~~a~~ significant positive correlation with ~~the~~ aboveground biomass, ~~whereas it had~~ and significant negative correlations with ~~the~~ slope gradient, vegetation coverage, vegetation height, crown width and basal diameter ( $P < 0.05$ , Table S4). ~~The soil~~Soil erodibility ~~of in~~ areas with black locust had ~~a~~ significant negative correlation with ~~the~~ elevation, ~~whereas it had~~ and significant positive correlations with ~~the~~ slope position, slope gradient, soil bulk density, vegetation coverage, litter biomass and branch number ( $P < 0.05$ , Table S4). ~~Meanwhile, soil~~Soil erodibility in areas under ~~different~~other vegetation types, such as ~~grasslands~~grassland or ~~farmlands were~~farmland, was more strongly correlated with soil or landscape properties ~~than other impact factors~~. The results of the ~~correlation analysis~~analyses of correlations between estimated  $K$  values and the selected environmental variables showed that soil erodibility in farmlands had significant positive correlations with ~~the slope position~~, slope shape and ~~average annual rainfall and displayed a~~ significant negative correlation with ~~the~~ slope gradient ( $P < 0.05$ , Table S1). ~~Soil~~The soil erodibility of areas with native grasslands had ~~a~~ significant a negative correlation with ~~the~~ elevation, ~~whereas it had~~ and significant positive correlations with ~~the~~ average annual rainfall and slope gradient ( $P < 0.05$ , Table S2). ~~Soil~~The soil erodibility of areas with pasture grasslands did not have significant correlations with ~~the~~ environmental variables other than soil organic matter content and ~~the~~ soil particle size ( $P < 0.05$ , Table S2). ~~The soil~~Soil erodibility ~~of in~~ areas with *Caragana korshinskii* had a significant positive correlation with ~~the~~ elevation, ~~whereas it had~~ and a

significant negative correlation with ~~the~~ average annual rainfall ( $P < 0.05$ , Table S3).

### 3.3 Principal component analysis of soil erodibility under different vegetation types

~~Our results showed the~~The PCA identified one PC each for apple orchards, native grasslands, sea buckthorn, *Caragana korshinskii* and pasture grasslands, which accounted for 100%, 48.88%, 62.05% and 53.61 of the variances, respectively (Table S5). ~~The PCA identified two PCs each for farmland and David's peach; the corresponding cumulative variances were 73.93 % and 81.07 %, respectively. For black locust, the PCA identified three PCs that accounted for 70.25 % of the variance (Table S5). In farmland, PC1 included two variables that had highly weighted factor loadings, the slope shape and slope position, and PC2 included only the slope gradient, which had a highly weighted factor loading. In apple orchards, the highly weighted factor loading was the plant density. In was the primary contributor to the high factor loading. For native grasslands, PC1 included two variables that had highly weighted factor loadings, including the slope gradient and elevation. The pasturePasture grasslands had no variables with highly weightedhigh factor loadings because it had no significant environmental variables except the soil particle size and soil organic matter. The highly weighted factor loadings in areas with sea buckthorn were the slope gradient, aboveground biomass and plant density. In areas planted with *Caragana korshinskii*, two variables had highly weighted factor loadings, including the average annual rainfall and elevation. In areas planted with black locust, the highly weighted factor loadings of PC1 were the slope position, elevation and litter biomass; for PC2, the slope gradient and soil bulk density had high factor loadings, whereas only vegetation coverage had a high weighted factor loading for PC3. In areas planted with David's peach, PC1 included three variables that had highly weighted factor loadings, specifically the crown width, vegetation height and vegetation coverage, whereas only the basal diameter had a high factor loading for PC2high factor loadings: average annual rainfall and elevation~~ (Table S5).

The PCA identified two PCs each for farmland and David's peach; the corresponding cumulative variances

were 73.93% and 81.07%, respectively. The PC1 for farmland included two variables that had high factor loadings, slope shape and slope position, whereas PC2 only included slope gradient. In areas planted with David's peach, crown width, vegetation height and vegetation coverage contributed to the high factor loading of PC1, whereas basal diameter alone had a high factor loading for PC2. In areas planted with black locust, the PCA identified three PCs that accounted for 70.25% of the variance (Table S5). PC1 had slope position, elevation and litter biomass as parameters with high factor loadings. The parameters with high factor loadings for PC2 were slope gradient and soil bulk density, and vegetation coverage had a high factor loading for PC3 (Table S5).

The MDS of ~~the~~ soil erodibility included six environmental variables for black locust, four for David's peach, three each for farmland and sea buckthorn, two each for native grasslands and *Caragana korshinskii*, one for apple orchards and none for pasture grasslands (Table ~~3~~, S1, Table S2, Table S3). In addition to ~~the~~ soil organic matter and soil particle size, which ~~are~~were included in the *K* value estimation equations, the dominant factors affecting ~~the~~ soil erodibility for farmland were slope shape, slope gradient and slope position. For apple orchards, the only dominant factor affecting soil erodibility (~~except the~~other than soil organic matter and soil particle size) was plant density. For areas with native grasslands, the dominant factors affecting soil erodibility were soil organic matter, soil particle size, slope gradient and elevation. For areas with sea buckthorn, the dominant factors affecting soil erodibility were aboveground biomass, slope gradient and plant density in addition to the two soil properties. The dominant factors affecting soil erodibility in areas with *Caragana korshinskii* were soil particle size, soil organic matter, average annual rainfall and elevation. For areas with black locust, the dominant factors were ~~the~~ slope gradient, slope position, elevation, litter biomass, soil bulk density and vegetation coverage in addition to the soil organic matter and soil particle size. The dominant factors affecting soil erodibility in areas with David's peach included ~~the~~ soil organic matter, soil particle size, crown width, vegetation height and vegetation coverage.

#### 4 Discussion

#### 4.1 The optimal methods for estimating $K$ values in the Ansai watershed

In this study, we found that different models resulted in different ~~estimations~~estimates of soil erodibility (Table 2). Since the different estimation methods use different soil attributes as input parameters; ~~even if the input parameters are the same~~, the decision coefficients of the same input parameters ~~are different~~will differ. For example, the EPIC model focuses on the features of the soil ~~partiele~~particles and soil nutrients, ~~while~~whereas the NOMO model focuses on not only ~~the~~ soil particle size and soil nutrient characteristics; but also the soil ~~structure~~structural characteristics, such as soil structure code and soil permeability code. The existing soil erodibility estimation equations are used to calculate soil erodibility based on data on ~~the~~ physicochemical soil properties, such as soil texture, soil structure, soil permeability and soil organic matter content (Wischmeier et al., 1971, 1978; Williams et al., 1990; Torri et al., 1997; Shirazi et al., 1988). Among these factors, the main physical soil property is ~~the~~ soil particle composition, such as the contents of sand, silt and clay, and the main chemical soil property is ~~the~~ soil organic matter content (Wei et al., 2017).

Our results showed that the  $K$  values based on the Torri, NOMO, and Shirazi models were ~~are~~ located close to each other in the Taylor diagrams (Fig. ~~3~~ 2) and ~~those that these~~ three models could therefore represent ~~the~~ soil erodibility in the Ansai watershed. Based on previous studies, these models have ~~also~~ been recommended as the optimal models ~~in Chinese for China's~~ subtropical zone, China's purple hilly region, Northeast China, and ~~Chinese~~ Loss China's Loess Plateau (Table 4). ~~We, however, suggested~~ However, we suggest that the Torri and Shirazi models ~~as better representatives of are~~ the best models; based on ~~their~~ estimated  $K$  values ~~and the~~ derived from these models and actual (measured) soil erodibility data ~~in from the~~ Ansai watershed (Zhang et al., 2001; Table S6). The estimated  $K$  ~~value~~values based on the Torri and Shirazi models were closer to the measured soil erodibility data among those of the three possible appropriate models (Table 2 and Table S6). Our ~~suggestions were also~~ findings are supported by a study by Lin et al. (2017) ~~who showed~~showing that the estimated  $K$  ~~value~~values based on the

Torri and Shirazi models ~~was~~were closer to the measured value- than NOMO model and M-NOMO model.

#### 4.2 Environmental factors that influenced ~~the~~ soil erodibility

Based on the definition of  $K$  factor by Wischmeier et al. (1971), soil ~~erodibility~~erodibility is estimated ~~by~~from texture data, organic matter content, soil structure index, and the soil permeability index. While soil ~~erodibility~~erodibility does not directly depend on environmental factors, soil properties such as soil particle size distribution and soil organic matter can be affected by environmental factors. Soil erodibility thus has indirect ~~relationship~~relationships with ~~the~~ environmental factors, particularly vegetation type ~~that, which~~ influences the generation of soil organic matter and the composition of soil ~~partiele~~particles. Soil erodibility had ~~different~~ ~~correlation~~various correlations with the selected environmental variables, which ~~resulted in changes in~~affected the dominant factors ~~that influenced the~~influencing soil erodibility (Tables S1-S5, Table 3). In native grasslands, soil erodibility had significant correlations with terrain factors (e.g., elevation, slope degree) (Table S1, Table S4), and the dominant factors influencing ~~the~~ soil erodibility were soil properties and topography. Terrain factors have close relationships with soil properties. With ~~the increase~~changes of elevation and slope, the physical and chemical ~~soil~~ properties of soil (e.g., soil permeability, soil bulk density, and soil ~~nutrient~~nutrients) and soil surface conditions ~~are changed, further lead~~(e.g., roughness, litter layer) change, leading to ~~the~~ changes ~~of~~in soil particle size composition and soil erodibility (Zhao et al., 2015). For example, Li et al. (2011) found that the silt content was higher than the sand content in low ~~than~~but not high elevations, and Liu et al. (2005) found that slope gradient ~~is~~was negatively correlated with soil nutrients (e.g., soil organic matter, available nitrogen).

For most artificially managed vegetation types (apple orchards and David's peach) and artificially restored vegetation types (e.g., sea buckthorn and black locust), soil erodibility had significant correlations with ~~the~~ vegetation properties (Table S1, Table S3-S4). By ~~changing the~~affecting physicochemical soil properties and soil structure stability, vegetation properties ~~could~~ affect soil erodibility. For example, the dominant ~~factor(s)~~factors

influencing ~~the~~ soil erodibility ~~associated with~~ were plant density for apple orchards ~~was plant density, sea~~  
~~buckthorn was,~~ aboveground biomass, ~~black locust were~~ for sea buckthorn litter biomass and vegetation  
coverage for black locust, and ~~David's peach were~~ crown width, vegetation height, basal diameter and vegetation  
coverage for David's peach (Table S1). ~~Because all these vegetation types are more or less affected by~~  
~~human~~ Human activities, ~~soil erodibility can also indirectly be affected by (e.g., pruning) affect~~ vegetation recovery  
and land cover change. These changes may then influence vegetation properties and thereby impact soil erodibility.

## 5 Conclusions

We evaluated soil erodibility in the Ansai watershed using five estimation models ~~in Ansai watershed; the~~.  
The estimated  $K$  values ~~based on~~ differed among the different models ~~were different from one another and the~~  
~~resulting  $K$  values~~ ranged between 0.009 and 0.092 t·hm<sup>2</sup>·hr<sup>-1</sup> / (MJ·mm·hm<sup>2</sup>). Based on Taylor diagrams and  
previous studies, we considered the Shirazi and Torri ~~model~~ models the optimal models for the Ansai watershed.  
Since soil erodibility is estimated by soil properties, ~~soil erodibility~~ it has indirect ~~relationship~~ relationships with  
~~environment~~ environmental factors, including elevation and slope degree, and to a lesser extent, human activities.  
By changing vegetation density, biomass, and cover, ~~human~~ humans can indirectly affect soil erodibility.

**Acknowledgments** This work was supported by the National Key Research Program of China (No.  
2016YFC0501604), the National Natural Science Foundation of China (No. 41771197), and the State Key  
Laboratory of Earth Surface Processes and Resource Ecology (No. 2017-FX-01(2)). We would like to thank Jing  
Wang, Xiao Zhang, Qiang Feng, Xuening Fang, Jingyi Ding, and Yuanxin Liu for their support and contributions  
during the fieldwork.

## References

Bagarello, V., Stefano, C. D., Ferro, V., Giordano, G., Iovino, M., Pampalone, V.: Estimating the USLE soil  
erodibility factor in Sicily, south Italy, Appl. Eng. Agric., 28, 199–206, 2012.

337 Bonilla, C. A., Johnson, O. I.: Soil erodibility mapping and its correlation with soil properties in Central Chile,  
 338 Geoderma, 189–190, 116–123, 2012.

339 Bryan, R. B., Govers, G., Poesenb, S. R. A.: The concept of soil erodibility and some problems of assessment and  
 340 application, Catena, 16, 393–412, 1989.

341 Cerdà, A., Keesstra, S. D., Rodrigo-Comino, J., Novara, A., Pereira, P., Brevik, E., Gimenez-morera A, Fernandez-  
 342 raga M, Pulido M, Prima S D, Jordán, A.: Runoff initiation, soil detachment and connectivity are enhanced  
 343 as a consequence of vineyards plantations, J. Environ. Manage., 202, 268–275, 2017.

344 Cerdà, A.: Soil aggregate stability under different Mediterranean vegetation types, Catena, 32, 73–86, 1998.

345 Chen, X. Y., Zhou, J.: Volume-based soil particle fractal relation with soil erodibility in a small watershed of  
 346 purple soil, Environ. Earth Sci., 70, 1735–1746, 2013.

347 Fang, X. N., Zhao, W. W., Wang, L. X., Feng, Q., Ding, J. Y., Liu, Y. X., Zhang, X.: Variations of deep soil moisture  
 348 under different vegetation types and influencing factors in a watershed of the Loess Plateau, China, Hydrol.  
 349 Earth Syst. Sci., 20, 3309–3323, 2016.

350 Feng, Q., Zhao, W. W., Qiu, Y., Zhao, M. Y., Zhong, L. N.: Spatial heterogeneity of soil moisture and the scale  
 351 variability of its influencing factors: a case study in the Loess Plateau of China, Water, 5, 1226–1242, 2013a.

352 Feng, X. M., Fu, B. J., Lu, N., Zeng, Y., Wu, B. F.: How ecological restoration alters ecosystem services: an  
 353 analysis of carbon sequestration in China's Loess Plateau, Sci. Rep-UK., 3, 28–46, 2013b.

354 Ferreira, V., Panagopoulos, T., Andrade, R., Guerrero, C., Loures, L.: Spatial variability of soil properties and soil  
 355 erodibility in the Alqueva reservoir watershed, Solid Earth, 6, 383–392, 2015.

356 Fu, B. J., Liu, Y., Lü, Y. H., He, C. S., Zeng, Y., Wu, B. F.: Assessing the soil erosion control service of ecosystems  
 357 change in the Loess Plateau of China, Ecol. Complex., 8, 284–293, 2011.

358 Fu, B. J., Wang, S., Liu, Y., Liu, J. B., Liang, W., Miao, C. Y.: Hydrogeomorphic ecosystem responses to natural  
 359 and anthropogenic changes in the Loess Plateau of China, *Annu. Rev. Earth Planet Sci.*, 45, 223–243, 2017.

360 Fu, B. J., Wang, Y. F., Lü, Y. H., He, C. S., Chen, L. D., Song, C. J.: The effects of land use combination on soil  
 361 erosion-a case study in Loess Plateau of China, *Prog. Phys. Geog.*, 33, 793–804, 2009.

362 Fu, B. J., Zhao, W. W., Chen, L. D., Zhang, Q. J., Lü, Y. H., Gulinck, H., Poesen, J.: Assessment of soil erosion at  
 363 large watershed scale using RUSLE and GIS: a case study in the Loess plateau of China, *Land Degrad. Dev.*,  
 364 16, 73–85, 2005.

365 Huang, J., Wang, J., Zhao, X. N., Li, H. B., Jing, Z. L., Gao, X. D., Chen, X. L., Pute, W.: Simulation study of the  
 366 impact of permanent groundcover on soil and water changes in jujube orchards on sloping ground, *Land*  
 367 *Degrad. Dev.*, 27(4), 946–954, 2016.

368 Hussein, M. H.: A sheet erodibility parameter for water erosion modeling in regions with low intensity rain,  
 369 *Hydrol. Res.*, 44, 1013–1021, 2013.

370 Igwe, C. A.: Erodibility of soils of the upper rainforest zone, southeastern nigeria, *Land Degrad. Dev.*, 14, 323–  
 371 334, 2003.

372 Kiani, F., Ghezelseflo, A.: Evaluation of soil erodibility factor(k) for loess derived landforms of Kechik  
 373 watershed in Golestan Province, North of Iran, *J. Mt. Sci-Engl.*, 13, 2028–2035, 2016.

374 Li, P., Li, Z. B., Zheng, Y.: Effect of different elevation on soil physical-chemical properties and erodibility in  
 375 dry-hot valley, *Bull. Soil Water Conserv.*, 31, 103–107, 2011. (in Chinese with English abstract).

376 Lin, F., Zhu, Z. L., Zeng, Q. C., An, S. S.: Comparative study of three different methods for estimation of soil  
 377 erodibility K in Yanhe Watershed of China, *Acta Pedologi Sinica.*, 54(5), 1136–1146, 2017. (in Chinese with  
 378 English abstract).

379 Liu, S. L., Guo, X. D., Lian, G., Fu, B. J., Wang, J.: Multi-scale analysis of spatial variation of soil characteristics  
380 in Loess Plateau-case study of Hengshan County, J. Soil Water Conserv., 19, 105–108, 2005. (in Chinese with  
381 English abstract).

382 Lü, Y. H., Fu B.J., Feng X. M., Zeng, Y., Liu, Y., Chang, R. Y., Sun, G., Wu, B. F.: A policy-driven large scale  
383 ecological restoration: quantifying ecosystem services changes in the Loess Plateau of China, PLoS ONE, 7,  
384 17–28, 2012.

385 Mandal, U. K., Warrington, D. N., Bhardwaj, A. K., Bar-Tal, A., Kautsky, L., Minz, D., Levy, G. J.: Evaluating  
386 impact of irrigation water quality on a calcareous clay soil using principal component analysis, Geoderma,  
387 144, 189–197, 2008.

388 Mwaniki, M. W., Agutu, N. O., Mbaka, J. G., Ngigi, T. G., Waithaka, E. H.: Landslide scar/soil erodibility mapping  
389 using Landsat TM/ETM+ bands 7 and 3 normalised difference index: A case study of central region of  
390 Kenya, Appl Geogr., 64, 108–120, 2015.

391 Wang, D. C., Zhang, G. L., Pan, X. Z., Zhao, Y. G., Zhao, M. S., Wang, G. F.: Mapping soil texture of a plain area  
392 using fuzzy-c-means clustering method based on land surface diurnal temperature difference, Pedosphere, 22,  
393 394-403, 2012.

394 Parajuli, S. P., Yang, Z., Kocurek, G.: Mapping erodibility in dust source regions based on geomorphology,  
395 meteorology, and remote sensing, J. Geophys. Res. Earth Surf., 119, 1977–1994, 2015.

396 Sanchis, M. P. S., Torri, D., Borselli, L., Poesen, J.: Climate effects on soil erodibility, Earth Surf. Proc. Land, 33,  
397 1082–1097, 2012.

398 Sepúlveda-Lozada, A., Geissen, V., Ochoa-Gaona, S., Jarquin-Sanchez, A., dela-Cruz, S. H., Capetillo, E.,  
399 Zamora- Cornelio, L. F., Revista, D. B. T.: Influence of three types of riparian vegetation on fluvial erosion  
400 control in Pantanos de Centla, Mexico, Rev. Biol. Trop., 57, 1153–1163, 2009.

401 Shirazi, M. A., Hart, J. W., Boersma, L.: A unifying quantitative analysis of soil texture: improvement of precision  
402 and extension of scale, *Soil Sci. Soc. of Am. J.*, 52, 181–190, 1988.

403 Tang, F. K., Cui, M., Lu, Q., Liu, Y. G., Guo, H. Y., Zhou, J. X.: Effects of vegetation restoration on the aggregate  
404 stability and distribution of aggregate-associated organic carbon in a typical karst gorge region, *Solid Earth*,  
405 7, 141–151, 2016.

406 Taylor, K.: Summarizing multiple aspects of model performance in a single diagram, *J. Geophys. Res.*, 106, 7183–  
407 7192, 2001.

408 Torri, D., Poesen, J., Borselli, L.: Predictability and uncertainty of the soil erodibility factor using a global  
409 dataset, *Catena*, 31, 1–22, 1997.

410 Vaezi, A. R., Abbasi, M., Bussi, G., Keesstra, S.: Modeling sediment yield in semi-arid pasture Micro Catchments,  
411 NW Iran, *Land Degrad. Dev.*, 28, 1274–1286, 2016b.

412 Vaezi, A. R., Hasanzadeh, H., Cerda, A.: Developing an erodibility triangle for soil textures in semi-arid regions,  
413 NW Iran, *Catena*, 142, 221–232, 2016a.

414 Wang, A. J., Li, Z. G.: Spatial distribution of soil erodibility in Upper Yangtze River Region, *Adv. Mater Res.*, 610–  
415 613, 2944–2947, 2012.

416 Wang, B., Zheng, F. L., Römken, M. J. M., Darboux, F.: Soil erodibility for water erosion: A perspective and  
417 Chinese experiences, *Geomorphology*, 187, 1–10, 2013a.

418 Wang, B., Zheng, F. L., Römken, M. J. M.: Comparison of soil erodibility factors in USLE, RUSLE2, EPIC  
419 and Dg models based on a Chinese soil erodibility database, *Acta Agr. Scand. B-S. P.*, 63, 69–79, 2013b.

420 Wang, G. Q., Fang, Q. F., Wu, B. B., Yang, H. C., Xu, Z. X.: Relationship between soil erodibility and modeled  
421 infiltration rate in different soils, *J. Hydrol.*, 528, 408–418, 2015.

422 Wei, H., Zhao, W. W., Wang, J.: Research process on soil erodibility, Chin. J. Appl. Ecol., 28, 2749–2759, ~~2017~~,  
423 2017a. (in Chinese with English abstract).

424 Wei, H., Zhao, W. W., Wang, J.: The optimal estimation method for K value of soil erodibility: A case study in  
425 Ansai Watershed, Science of Soil and Water Conservation, 15, 52-62, 2017b. (in Chinese with English  
426 abstract).

427 Williams, J. R.: The erosion-productivity impact calculator (EPIC) model: A case history, Phil. Trans. R. Soc. B.,  
428 329, 421–428, 1990.

429 Wischmeier, W. H., Johnson, C. B., Cross, B. V.: Soil erodibility nomograph for farmland and construction  
430 sites, J. Soil Water Conserv., 26, 189–193, 1971.

431 Wischmeier, W. H., Smith, D. D.: Predicting rainfall erosion losses-a guide to conservation planning, United  
432 States. Dept. of Agriculture Handbook, 537, 1978.

433 Wu, L., Liu, X., Ma, X.: Application of a modified distributed-dynamic erosion and sediment yield model in a  
434 typical watershed of hilly and gully region, Chinese Loess Plateau, Solid Earth, 1–26, 2016.

435 Xu, X. L., Ma, K. M., Fu, B. J., Song, C. J., Liu, W.: Relationships between vegetation and soil and topography in  
436 a dry warm river valley, SW China, Catena, 75, 138–145, 2008.

437 Yu, Y., Wei, W., Chen, L. D., Yang, L., Jia, F. Y., Zhang, H. D.: Responses of vertical soil moisture to rainfall pulses  
438 and land uses in a typical loess hilly area, china, Solid Earth, 6(2), 595–608, 2015.

439 Zhang, K. L., Shu, A. P., Xu, X. L., Yang, Q. K., Yu, B.: Soil erodibility and its estimation for agricultural soils in  
440 China, J. Arid Environ., 72, 1002–1011, 2008.

441 Zhao, M. Y., Zhao, W. W., Liu, Y. X.: Comparative analysis of soil particle size distribution and its influence  
442 factors in different scales: a case study in the Loess hilly-gully area, Acta Ecologica Sinica, 35, 4625–4632,  
443 2015. (in Chinese with English abstract).

444 Zhao, W. W., Fu, B. J., Chen, L. D.: A comparison between soil loss evaluation index and the C-factor of RUSLE:  
445 a case study in the Loess Plateau of China, Hydrol. Earth Syst. Sci., 16, 2739–2748, 2012.  
446

447 **Table 1** Landscape and soil characteristics in the study area

| Vegetation  | Natural vegetation | Artificially managed vegetation | Artificially restored vegetation |         |         |         |         |         |
|-------------|--------------------|---------------------------------|----------------------------------|---------|---------|---------|---------|---------|
| type        | NG                 | FL                              | AO                               | PG      | SB      | CK      | BL      | DP      |
| Sampling    | 25                 | 22                              | 10                               | 11      | 15      | 18      | 38      | 12      |
| number      |                    |                                 |                                  |         |         |         |         |         |
| Ele (m)     | 1392.60            | 1380.14                         | 1370.10                          | 1401.00 | 1435.67 | 1350.61 | 1326.54 | 1377.58 |
| SG (°)      | 16.72              | 6.27                            | 19.90                            | 11.91   | 16.40   | 17.56   | 27.24   | 24.17   |
| Cla (%)     | 7.44               | 7.93                            | 7.05                             | 7.88    | 6.70    | 7.21    | 8.30    | 8.34    |
| Sil (%)     | 45.08              | 52.63                           | 48.57                            | 42.73   | 45.05   | 48.08   | 51.75   | 49.69   |
| San (%)     | 47.48              | 39.44                           | 44.38                            | 49.39   | 48.25   | 44.71   | 39.95   | 41.97   |
| OM ( g/kg)  | 7.04               | 5.31                            | 5.75                             | 6.30    | 8.91    | 13.30   | 8.10    | 5.99    |
| SBD (g/cm³) | 1.26               | 1.29                            | 1.25                             | 1.28    | 1.23    | 1.26    | 1.23    | 1.26    |
| Por (%)     | 0.48               | 0.46                            | 0.48                             | 0.47    | 0.48    | 0.49    | 0.49    | 0.49    |
| AAR (mm)    | 473.99             | 479.01                          | 479.85                           | 471.75  | 476.44  | 474.66  | 474.43  | 472.58  |
| VC (%)      | 57.36              | 53.14                           | 39.70                            | 67.82   | 66.07   | 46.28   | 59.58   | 33.75   |
| AB (g/m²)   | 28.96              | 95.61                           | 12.24                            | 73.56   | 28.59   | 45.63   | 23.92   | 16.20   |
| VH (m)      | 0.59               | 1.83                            | 3.58                             | 0.67    | 2.16    | 1.81    | 11.49   | 3.02    |
| LB (g/m²)   | 15.70              | —                               | 8.64                             | 12.06   | 25.10   | 34.05   | 72.50   | 14.44   |
| PD (/m²)    | —                  | —                               | 30.50                            | —       | 262.40  | 131.89  | 58.66   | 36.17   |
| Cro (cm)    | —                  | —                               | 398.39                           | —       | 184.85  | 205.20  | 448.72  | 293.40  |
| BD (cm)     | —                  | —                               | 6.32                             | —       | 3.76    | 1.59    | 10.16   | 4.98    |
| BN          | —                  | —                               | 10.17                            | —       | —       | 27.88   | 12.86   | 8.13    |

448 Annotation: NG refers to native grassland, AO refers to apple orchard, FL refers to farmland, PG refers to pasture  
449 grassland, SB refers to sea buckthorn, CK refers to *Caragana korshinskii*, DP refers to David's peach, BL refers to black  
450 locust, Ele refers to elevation, SP refers to slope position, SA refers to slope aspect, SG refers to slope gradient, SS refers  
451 to slope shape, Cla refers to clay, Sil refers to silt, San refers to sand, OM refers to organic matter, SBD refers  
452 to soil bulk density, Por refers to porosity, AAR refers to average annual rainfall, VC refers to vegetation coverage, AB  
453 refers to aboveground biomass, VH refers to vegetation height, LB refers to litter biomass, PD refers to plant density, Cro  
454 refers to crown, BD refers to basal diameter, and BN refers to branch number.

456 **Table 2** Statistics of soil erodibility in the Ansai watershed

| <del>Methods</del><br>Method | Mean  | Max   | Min   | Median | SD    | <del>Skewn</del><br>Skewness | <del>Kurt</del><br>Kurtosis | Cv    |
|------------------------------|-------|-------|-------|--------|-------|------------------------------|-----------------------------|-------|
| EPIC                         | 0.046 | 0.060 | 0.032 | 0.045  | 0.005 | 0.408                        | 0.946                       | 0.109 |
| NOMO                         | 0.073 | 0.092 | 0.046 | 0.074  | 0.008 | -0.447                       | 0.956                       | 0.110 |
| M-NOMO                       | 0.075 | 0.088 | 0.047 | 0.075  | 0.005 | -1.079                       | 4.353                       | 0.067 |
| Torri                        | 0.053 | 0.066 | 0.009 | 0.053  | 0.006 | -2.639                       | 16.872                      | 0.113 |
| Shirazi                      | 0.033 | 0.044 | 0.018 | 0.033  | 0.006 | 0.059                        | 0.009                       | 0.182 |

457 Annotation: EPIC ~~refers to~~notes the erosion-productivity impact model, NOMO ~~refers to~~notes the nomograph equation, M-NOMO ~~refers to~~notes  
458 the modified nomograph equation, Torri ~~refers to~~notes the *K* value estimation model established by Torri, Shirazi ~~refers to~~notes the *K* value  
459 estimation model established by Shirazi, SD ~~refers to~~notes the standard deviation, ~~Skewn~~ refers to the ~~and~~ Skewness, Kurt refers to the kurtosis, Cv  
460 ~~refers to~~notes the coefficient of variation, ~~and P~~ refers to p-value of Kolmogorov-Smirnov test.

462 **Table 3** Principal component analysis (PCA) of environmental attributes

| Vegetation <del>type</del> <u>type</u>                                            | Main influencing factors |
|-----------------------------------------------------------------------------------|--------------------------|
| Farmland                                                                          | SS, SP, SG               |
| Apple orchard                                                                     | PD                       |
| Native <del>grasses</del> <u>grasses</u> <del>grasslands</del> <u>grasslands</u>  | SG, Ele                  |
| Pasture <del>grasses</del> <u>grasses</u> <del>grasslands</del> <u>grasslands</u> | —                        |
| Sea buckthorn                                                                     | AB, SG, PD               |
| <i>Caragana korshinskii</i>                                                       | AAR, Ele                 |
| Black locust                                                                      | SG, SP, Ele, LB, SBD, VC |
| David's <del>s</del> <u>s</u> peach                                               | Cro, VH, BD, VC          |

463 Annotation: SS ~~refers to~~denotes slope shape, SP ~~refers to~~denotes slope position, SG ~~refers to~~denotes slope gradient, PD ~~refers to~~denotes plant density,  
464 Ele ~~refers to~~denotes elevation, AB ~~refers to~~denotes aboveground biomass, AAR ~~refers to~~denotes average annual rainfall, LB ~~refers to~~denotes litter  
465 biomass, SBD ~~refers to~~denotes soil bulk density, VC ~~refers to~~denotes vegetation coverage, Cro ~~refers to~~denotes crown width, VH ~~refers to~~denotes  
466 vegetation height, and BD ~~refers to~~denotes basal diameter.

469 **Table 4** Suggested soil erodibility estimation models in China

| Study area                                                                  | <del>optimal models</del> Optimal<br>model(s) | References         |
|-----------------------------------------------------------------------------|-----------------------------------------------|--------------------|
| Hilly area of <del>Chinese</del> China's subtropical zone                   | Torri                                         | Zhang et al., 2009 |
| Purple hilly region <del>in</del> of Sichuan Basin                          | EPIC and NOMO <sub>7</sub>                    | Shi et al., 2012   |
| <del>typical</del> Typical black soil region in Northeast China             | EPIC and NOMO <sub>7</sub>                    | Wang et al., 2012  |
| Hilly and gully area of <del>Chinese</del> China's <del>Loess</del> Plateau | Torri and Shirazi                             | Lin et al., 2017   |
| Hilly and gully area of <del>Chinese</del> China's <del>Loess</del> Plateau | Shirazi                                       | Wei et al., 2017   |

470

471

472 **Fig. 1** ~~Location~~Locations of the study area and the sampling points

473 **Fig. 2** ~~Frequency distributions of soil erodibility~~

474 **Fig. 3** Taylor diagram ~~were~~ used to compare ~~the estimating~~estimated  $K$  values among models

475

476 Figure 1

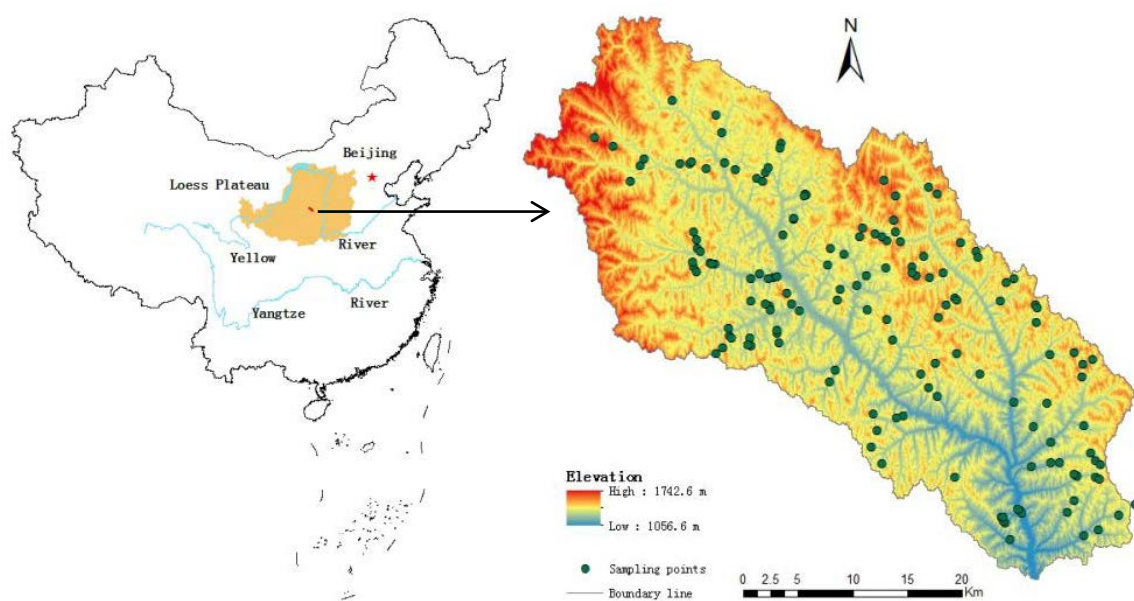

477

478

479 Figure 2

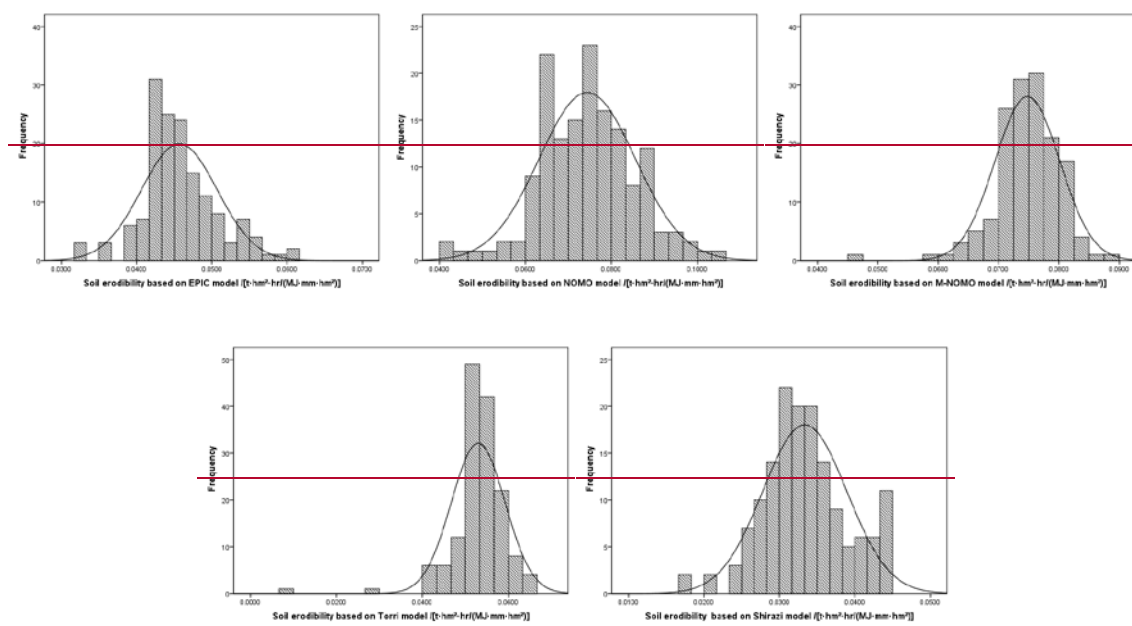

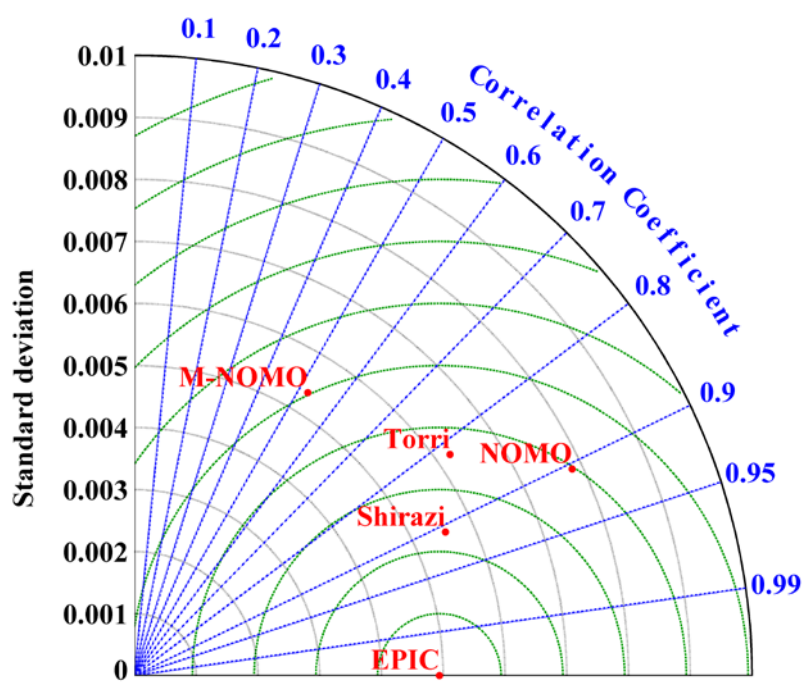

Supplement: Supplementary file 1 [file se-9-1507-2018-supplement.zip › Manuscript with changes traking.pdf]
