# Supplementary material for: Soil erodibility and its influencing factors on the Loess Plateau of China: a case study in the Ansai watershed
Source: Copernicus journal article supplement (doi:10.5194/se-9-1507-2018), 2018-12-20
Supplement: Supplementary file 1 [file se-9-1507-2018-supplement.zip]

Archive with 3 entries (3 files):
- se-9-1507-2018-supplement-title-page.pdf
- Supporting Information.pdf
- Manuscript with changes traking.pdf
