# Supplementary material for: Soil erodibility and its influencing factors on the Loess Plateau of China: a case study in the Ansai watershed
Source: Copernicus journal article supplement (doi:10.5194/se-9-1507-2018), 2018-12-20
Supplement: Supplementary file 1 [file se-9-1507-2018-supplement.zip › se-9-1507-2018-supplement-title-page.pdf]

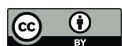

## *Supplement of*

# **Soil erodibility and its influencing factors on the Loess Plateau of China: a case study in the Ansai watershed**

**Wenwu Zhao et al.**

*Correspondence to:* Wenwu Zhao ([zhaoww@bnu.edu.cn](mailto:zhaoww@bnu.edu.cn))

- [se-9-1507-2018-supplement-title-page.pdf](#)
- [Manuscript with changes tracking.pdf](#)
- [Supporting Information.pdf](#)

The copyright of individual parts of the supplement might differ from the CC BY 4.0 License.
