# Supplementary material for: Soil erodibility and its influencing factors on the Loess Plateau of China: a case study in the Ansai watershed
Source: Copernicus journal article supplement (doi:10.5194/se-9-1507-2018), 2018-12-20
Supplement: Supplementary file 1 [file se-9-1507-2018-supplement.zip › Supporting Information.pdf]

## **Supporting Information**

### **Tables S1 to S6**

Table S1 Spearman correlations between soil erodibility and environmental variables under FL and AO

Table S2 Spearman correlations between soil erodibility and environmental variables under NG and PG

Table S3 Spearman correlations between soil erodibility and environmental variables under SB and CK

Table S4 Spearman correlations between soil erodibility and environmental variables under DP and BL

Table S5 Principal component analysis (PCA) of environmental attributes

Table S6 Soil erodibility calculated using data from plots at Ansai station (from Zhang et al., 2001)

List 1     Abbreviations used in this study

**Table S1** Spearman correlations between soil erodibility and environmental variables under FL and AO

| Environmental<br>variable | Farmland             |                      |                      |                      |                      | Apple orchards |        |        |              |        |
|---------------------------|----------------------|----------------------|----------------------|----------------------|----------------------|----------------|--------|--------|--------------|--------|
|                           | I                    | II                   | III                  | IV                   | V                    | I              | II     | III    | IV           | V      |
| Ele                       | -0.304               | -0.021               | 0.069                | -0.100               | -0.350               | 0.546          | 0.579  | -0.121 | 0.606        | 0.458  |
| SP                        | 0.409                | 0.303                | 0.406                | 0.403                | 0.351                | -0.043         | -0.177 | -0.321 | -0.181       | -0.018 |
| SA                        | 0.382                | 0.370                | 0.164                | 0.467                | 0.479                | 0.046          | 0.067  | -0.210 | 0.176        | -0.070 |
| SG                        | <b><u>-0.781</u></b> | <b><u>-0.669</u></b> | <b><u>-0.485</u></b> | <b><u>-0.641</u></b> | <b><u>-0.799</u></b> | 0.166          | 0.052  | 0.054  | 0.214        | 0.114  |
| SS                        | <b><u>0.591</u></b>  | <b><u>0.540</u></b>  | <b><u>0.610</u></b>  | <b><u>0.591</u></b>  | <b><u>0.532</u></b>  | 0.175          | 0.178  | 0.008  | 0.303        | 0.045  |
| SBD                       | 0.036                | -0.170               | -0.217               | 0.042                | 0.047                | 0.132          | 0.175  | 0.369  | 0.254        | 0.101  |
| Por                       | -0.039               | 0.167                | 0.280                | 0.004                | -0.037               | -0.184         | -0.235 | -0.567 | -0.296       | -0.182 |
| AAR                       | 0.281                | 0.407                | <b>0.513</b>         | 0.316                | 0.274                | -0.335         | -0.379 | -0.110 | -0.293       | 0.318  |
| VC                        | 0.194                | -0.082               | -0.110               | -0.017               | 0.152                | 0.174          | 0.191  | 0.027  | 0.286        | 0.174  |
| AB                        | 0.277                | 0.063                | 0.002                | 0.151                | 0.233                | 0.087          | 0.059  | 0.429  | 0.202        | 0.075  |
| VH                        |                      |                      |                      |                      |                      | -0.236         | -0.162 | -0.515 | -0.200       | -0.215 |
| LB                        |                      |                      |                      |                      |                      | 0.361          | 0.228  | 0.494  | 0.199        | 0.382  |
| PD                        |                      |                      |                      |                      |                      | <b>0.632</b>   | 0.606  | 0.011  | <b>0.640</b> | 0.587  |
| Cro                       |                      |                      |                      |                      |                      | -0.483         | -0.541 | -0.005 | -0.498       | -0.470 |
| BD                        |                      |                      |                      |                      |                      | -0.268         | -0.324 | 0.188  | -0.249       | -0.270 |
| BN                        |                      |                      |                      |                      |                      | -0.352         | -0.405 | 0.079  | -0.396       | -0.316 |

Annotation: I, II, III, IV and V represent  $K_{EPIC}$ ,  $K_{NOMO}$ ,  $K_{M-NOMO}$ ,  $K_{Torri}$  and  $K_{Shirazi}$ , respectively. Ele denotes elevation, SP denotes slope position, SA denotes slope aspect, SG denotes slope gradient, SS denotes slope shape, SBD denotes soil bulk density, Por denotes porosity, AAR denotes average annual rainfall, VC denotes vegetation coverage, AB denotes aboveground biomass, VH denotes vegetation height, LB denotes litter biomass, PD denotes plant density, Cro denotes crown width, BD denotes basal diameter, and BN denotes branch number. Significant correlations ( $P < 0.05$ ) are shown in bold, and very significant correlations ( $P < 0.01$ ) are shown in bold and underlined.

**Table S2** Spearman correlations between soil erodibility and environmental variables under NG and PG

| Environmental<br>variable | Native grasslands |                      |              |                      |        | Pasture grasslands |        |        |        |        |
|---------------------------|-------------------|----------------------|--------------|----------------------|--------|--------------------|--------|--------|--------|--------|
|                           | I                 | II                   | III          | IV                   | V      | I                  | II     | III    | IV     | V      |
| Ele                       | -0.393            | <b><u>-0.515</u></b> | -0.360       | <b><u>-0.580</u></b> | -0.338 | -0.309             | -0.373 | -0.182 | -0.473 | -0.236 |
| SP                        | 0.111             | 0.083                | -0.158       | 0.051                | 0.118  | 0.543              | 0.543  | 0.389  | 0.543  | 0.524  |
| SA                        | 0.154             | 0.094                | 0.008        | 0.039                | 0.075  | 0.036              | 0.143  | 0.107  | 0.536  | 0.036  |
| SG                        | 0.082             | 0.080                | <b>0.430</b> | 0.114                | 0.089  | -0.127             | -0.170 | -0.127 | -0.259 | -0.028 |
| SS                        | 0.285             | 0.321                | 0.061        | 0.291                | 0.307  | 0.348              | 0.348  | 0.422  | 0.348  | 0.323  |
| SBD                       | -0.016            | 0.073                | -0.238       | 0.115                | 0.002  | -0.100             | -0.082 | -0.182 | 0.036  | -0.245 |
| Por                       | -0.121            | -0.192               | 0.130        | -0.210               | -0.110 | 0.118              | 0.064  | 0.018  | -0.027 | 0.255  |
| AAR                       | 0.245             | <b>0.399</b>         | <b>0.412</b> | <b>0.413</b>         | 0.220  | 0.1401             | 0.446  | 0.346  | 0.460  | 0.401  |
| VC                        | -0.228            | -0.330               | -0.139       | -0.293               | -0.184 | -0.175             | -0.234 | 0.000  | -0.414 | -0.161 |
| AB                        | 0.235             | 0.205                | -0.028       | 0.180                | 0.155  | -0.064             | -0.118 | 0.091  | -0.191 | -0.064 |
| VH                        | 0.117             | 0.163                | 0.224        | 0.194                | 0.045  | 0.045              | -0.018 | 0.345  | -0.127 | 0.045  |
| LB                        | 0.245             | 0.255                | 0.266        | 0.306                | 0.253  | -0.128             | -0.118 | -0.032 | 0.100  | -0.241 |

Annotation: I, II, III, IV and V denote  $K_{EPIC}$ ,  $K_{NOMO}$ ,  $K_{M-NOMO}$ ,  $K_{Torri}$ , and  $K_{Shirazi}$ , respectively. Ele denotes elevation, SP denotes slope position, SA denotes slope aspect, SG denotes slope gradient, SS denotes slope shape, SBD denotes soil bulk density, Por denotes porosity, AAR denotes average annual rainfall, VC denotes vegetation coverage, AB denotes aboveground biomass, VH denotes vegetation height, and LB denotes litter biomass. Significant correlations ( $P < 0.05$ ) are shown in bold, and very significant correlations ( $P < 0.01$ ) are shown in bold and underlined.

**Table S3** Spearman correlations between soil erodibility and environmental variables under SB and CK

| Environmental<br>variable | Sea buckthorn |        |              |        |               | <i>Caragana korshinskii</i> |               |              |        |               |
|---------------------------|---------------|--------|--------------|--------|---------------|-----------------------------|---------------|--------------|--------|---------------|
|                           | I             | II     | III          | IV     | V             | I                           | II            | III          | IV     | V             |
| Ele                       | 0.207         | 0.071  | 0.111        | 0.268  | -0.129        | 0.253                       | 0.344         | <b>0.498</b> | 0.350  | 0.164         |
| SP                        | 0.080         | 0.219  | -0.265       | -0.086 | 0.294         | 0.119                       | 0.119         | 0.182        | 0.204  | 0.077         |
| SA                        | 0.176         | 0.154  | 0.407        | 0.462  | 0.121         | 0.000                       | 0.094         | 0.206        | 0.147  | -0.147        |
| SG                        | -0.344        | -0.482 | -0.186       | 0.013  | <b>-0.654</b> | 0.233                       | 0.190         | 0.362        | 0.325  | 0.105         |
| SS                        | -0.051        | 0.027  | -0.504       | -0.430 | 0.273         | -0.051                      | -0.118        | -0.133       | -0.079 | -0.198        |
| SBD                       | 0.114         | 0.189  | -0.061       | 0.250  | 0.204         | 0.191                       | 0.249         | 0.259        | 0.319  | -0.131        |
| Por                       | 0.121         | -0.032 | -0.239       | -0.311 | 0.104         | -0.024                      | -0.055        | 0.051        | -0.065 | 0.174         |
| AAR                       | 0.238         | 0.366  | <b>0.549</b> | 0.315  | 0.370         | <b>-0.545</b>               | <b>-0.502</b> | -0.233       | -0.410 | <b>-0.498</b> |
| VC                        | -0.253        | -0.079 | 0.074        | -0.009 | -0.149        | 0.072                       | -0.016        | -0.325       | -0.048 | 0.004         |
| AB                        | 0.450         | 0.507  | 0.225        | 0.339  | <b>0.529</b>  | -0.077                      | -0.197        | -0.278       | -0.226 | -0.082        |
| VH                        | 0.336         | 0.461  | 0.232        | -0.061 | 0.443         | -0.211                      | -0.293        | -0.392       | -0.286 | -0.148        |
| LB                        | 0.325         | 0.204  | 0.182        | 0.257  | 0.132         | -0.185                      | -0.307        | -0.366       | -0.416 | -0.079        |
| PD                        | -0.279        | -0.418 | -0.154       | -0.100 | <b>-0.543</b> | 0.092                       | -0.024        | -0.239       | -0.065 | 0.120         |
| Cro                       | 0.064         | 0.046  | -0.143       | -0.261 | 0.011         | -0.358                      | -0.335        | -0.267       | -0.296 | -0.350        |
| BD                        | -0.104        | -0.061 | -0.257       | -0.429 | -0.032        | -0.199                      | -0.275        | -0.316       | -0.235 | -0.159        |

Annotation: I, II, III, IV and V denote  $K_{EPIC}$ ,  $K_{NOMO}$ ,  $K_{M-NOMO}$ ,  $K_{Torri}$  and  $K_{Shirazi}$ , respectively. Ele denotes elevation, SP denotes slope position, SA denotes slope aspect, SG denotes slope gradient, SS denotes slope shape, SBD denotes soil bulk density, Por denotes porosity, AAR denotes average annual rainfall, VC denotes vegetation coverage, AB denotes aboveground biomass, VH denotes vegetation height, LB denotes litter biomass, PD denotes plant density, Cro denotes crown width, and BD denotes basal diameter. Significant correlations ( $P < 0.05$ ) are shown in bold, and very significant correlations ( $P < 0.01$ ) are shown in bold and underlined.

**Table S4** Spearman correlations between soil erodibility and environmental variables under DP and BL

| Environmental<br>variable | David's peach        |                      |                      |                      |                      | Black locust         |                      |                     |                      |                      |
|---------------------------|----------------------|----------------------|----------------------|----------------------|----------------------|----------------------|----------------------|---------------------|----------------------|----------------------|
|                           | I                    | II                   | III                  | IV                   | V                    | I                    | II                   | III                 | IV                   | V                    |
| Ele                       | 0.049                | 0.098                | 0.168                | -0.084               | -0.056               | <b><u>-0.523</u></b> | <b><u>-0.553</u></b> | -0.149              | <b><u>-0.515</u></b> | <b><u>-0.511</u></b> |
| SP                        | -0.323               | -0.393               | -0.362               | -0.118               | -0.165               | <b><u>0.493</u></b>  | <b><u>0.378</u></b>  | <b><u>0.335</u></b> | <b><u>0.394</u></b>  | <b><u>0.502</u></b>  |
| SA                        | 0.336                | 0.191                | 0.100                | 0.318                | 0.382                | -0.059               | -0.087               | -0.099              | -0.080               | -0.056               |
| SG                        | -0.473               | -0.539               | <b><u>-0.602</u></b> | -0.564               | -0.333               | 0.286                | 0.250                | -0.006              | 0.206                | <b><u>0.368</u></b>  |
| SS                        | -0.138               | -0.222               | -0.142               | -0.011               | -0.120               | -0.016               | 0.012                | -0.136              | -0.002               | 0.042                |
| SBD                       | -0.168               | -0.168               | 0.042                | -0.147               | -0.091               | 0.010                | 0.052                | <b><u>0.321</u></b> | 0.057                | -0.009               |
| Por                       | 0.134                | 0.308                | -0.070               | 0.147                | 0.441                | 0.208                | 0.133                | -0.249              | 0.091                | 0.310                |
| AAR                       | -0.092               | 0.007                | 0.183                | 0.169                | -0.106               | 0.151                | 0.217                | -0.038              | 0.208                | 0.106                |
| VC                        | <b><u>-0.837</u></b> | <b><u>-0.787</u></b> | <b><u>-0.723</u></b> | <b><u>-0.837</u></b> | <b><u>-0.794</u></b> | 0.274                | 0.221                | -0.060              | 0.213                | <b><u>0.370</u></b>  |
| AB                        | <b><u>0.769</u></b>  | <b><u>0.650</u></b>  | 0.490                | <b><u>0.692</u></b>  | <b><u>0.804</u></b>  | -0.017               | -0.085               | 0.112               | -0.065               | -0.049               |
| VH                        | <b><u>-0.594</u></b> | -0.531               | -0.448               | -0.392               | -0.552               | 0.104                | 0.023                | -0.007              | 0.067                | 0.142                |
| LB                        | -0.056               | -0.217               | -0.196               | -0.126               | 0.035                | <b><u>0.433</u></b>  | <b><u>0.426</u></b>  | 0.228               | <b><u>0.454</u></b>  | <b><u>0.429</u></b>  |
| PD                        | 0.329                | 0.294                | 0.154                | 0.000                | 0.315                | 0.092                | 0.111                | -0.095              | 0.090                | 0.156                |
| Cro                       | <b><u>-0.671</u></b> | <b><u>-0.580</u></b> | -0.448               | -0.469               | <b><u>-0.622</u></b> | 0.276                | 0.227                | 0.134               | 0.250                | 0.274                |
| BD                        | <b><u>-0.713</u></b> | <b><u>-0.615</u></b> | -0.490               | <b><u>-0.580</u></b> | <b><u>-0.664</u></b> | 0.217                | 0.129                | -0.053              | 0.140                | 0.199                |
| BN                        | -0.559               | -0.406               | -0.287               | -0.315               | -0.545               | 0.315                | 0.269                | 0.301               | 0.307                | 0.275                |

Annotation: I, II, III, IV and V denote  $K_{EPIC}$ ,  $K_{NOMO}$ ,  $K_{M-NOMO}$ ,  $K_{Torri}$  and  $K_{Shirazi}$ , respectively. Ele denotes elevation, SP denotes slope position, SA denotes slope aspect, SG denotes slope gradient, SS denotes slope shape, SBD denotes soil bulk density, Por denotes porosity, AAR denotes average annual rainfall, VC denotes vegetation coverage, AB denotes aboveground biomass, VH denotes vegetation height, LB denotes litter biomass, PD denotes plant density, Cro denotes crown width, BD denotes basal diameter, and BN denotes branch number. Significant correlations ( $P < 0.05$ ) are shown in bold, and very significant correlations ( $P < 0.01$ ) are shown in bold and underlined.

**Table S5** Principal component analysis (PCA) of environmental attributes

| Principal component | FL          |             | AO          | NG           | PG  | SB           | CK          | BL           |              | DP          |             |             |
|---------------------|-------------|-------------|-------------|--------------|-----|--------------|-------------|--------------|--------------|-------------|-------------|-------------|
|                     | PC1         | PC2         | PC1         | PC1          | PC1 | PC1          | PC1         | PC1          | PC2          | PC3         | PC1         | PC2         |
| Eigenvalue          | 1.93        | 1.03        | 1.00        | 1.47         | —   | 2.48         | 1.07        | 2.51         | 1.41         | 1.00        | 3.49        | 1.38        |
| Variance (%)        | 48.15       | 25.78       | 100.00      | 48.88        | —   | 62.05        | 53.61       | 35.87        | 20.07        | 14.31       | 58.14       | 22.93       |
| Cumulative (%)      | 48.15       | 73.93       | 100.00      | 48.88        | —   | 62.05        | 53.61       | 35.87        | 55.94        | 70.25       | 58.14       | 81.07       |
| Factor loading      |             |             |             |              |     |              |             |              |              |             |             |             |
| AAR                 | 0.55        | 0.59        |             | 0.58         |     | -0.61        | <b>0.73</b> |              |              |             |             |             |
| SG                  | -0.40       | <b>0.78</b> |             | <b>0.72</b>  |     | <b>0.82</b>  |             | 0.49         | <b>0.72</b>  | -0.33       | 0.73        | 0.11        |
| SS                  | <b>0.84</b> | -0.21       |             |              |     |              |             |              |              |             |             |             |
| SP                  | <b>0.87</b> | 0.19        |             |              |     |              |             | <b>0.68</b>  | -0.32        | 0.24        |             |             |
| AB                  |             |             |             |              |     | <b>-0.83</b> |             |              |              |             | -0.49       | -0.69       |
| PD                  |             |             | <b>1.00</b> |              |     | <b>0.86</b>  |             |              |              |             |             |             |
| Cro                 |             |             |             |              |     |              |             |              |              |             | <b>0.95</b> | -0.19       |
| Ele                 |             |             |             | <b>-0.79</b> |     |              | <b>0.73</b> | <b>-0.75</b> | -0.00        | 0.19        |             |             |
| VH                  |             |             |             |              |     |              |             |              |              |             | <b>0.94</b> | -0.27       |
| BD                  |             |             |             |              |     |              |             |              |              |             | -0.33       | <b>0.83</b> |
| LB                  |             |             |             |              |     |              |             | <b>0.74</b>  | -0.14        | -0.08       |             |             |
| BN                  |             |             |             |              |     |              |             | 0.57         | 0.43         | -0.06       |             |             |
| VC                  |             |             |             |              |     |              |             | 0.39         | 0.18         | <b>0.86</b> | <b>0.91</b> | 0.32        |
| SBD                 |             |             |             |              |     |              |             | 0.47         | <b>-0.74</b> | -0.24       |             |             |

Annotation: NG denotes native grasslands, AO denotes apple orchards, FL denotes farmland, PG denotes pasture grasslands, SB denotes sea buckthorn, CK denotes *Caragana korshinskii*, DP denotes David's peach, BL denotes black locust, PC denotes principal component, AAR denotes average annual rainfall, SG denotes slope gradient, SS denotes slope shape, SP denotes slope position, AB denotes aboveground biomass, PD denotes plant density, Cro denotes crown width, Ele denotes elevation, VH denotes vegetation height, BD denotes basal diameter, LB denotes litter biomass, BN denotes branch number, and VC denotes vegetation coverage. The highly weighted factor loadings are shown in bold.

**Table S6** Soil erodibility calculated using data from plots at Ansai station (From Zhang et al., 2001)

| Slope degree | Slope length | Soil erodibility | Average |
|--------------|--------------|------------------|---------|
| 5            | 20           | 0.0437           |         |
| 10           | 20           | 0.0421           |         |
| 15           | 20           | 0.0446           |         |
| 20           | 20           | 0.0428           | 0.0432  |
| 25           | 20           | 0.0452           |         |
| 28           | 20           | 0.0409           |         |

Note: The plots had no vegetation cover.

### **List 1 Abbreviations used in this study**

AAR - average annual rainfall

AB - aboveground biomass

AO - apple orchards

BD - basal diameter

BL - black locust

BN - branch number

c - organic carbon content

CK - *Caragana korshinskii*

CLA - percentage clay content

Cro - crown width

Dg – Naouerian logarithm of geometric mean of the particle size distribution

DP - David's peach

Ele - specific elevation

FL - farmland

*K* - soil erodibility

LB - litter biomass

MDS - minimum data set

NG - native grassland

OM - organic matter content

PCA - principal component analysis

PCs - principal components

PD - plant density

PG - pasture grassland

Por - porosity

SA - slope aspect

SAN - percentage sand content

SB - sea buckthorn

SBD - soil bulk density

SG - slope gradient

SIL - percentage silt content

SP - slope position

SS - slope shape

USLE/RUSLE - universal soil loss equation/revised universal soil loss equation

VC - vegetation coverage

VH - vegetation height
